# Supplementary material for: Restoring the Oxidase-Like Activity of His@AuNCs for the Determination of Alkaline Phosphatase
Source: MDPI journal article supplement (doi:10.3390/bios11060174), 2021-05-30
Supplement: s1 [file s1]

# Supplementary Materials

## Restoring the Oxidase-Like Activity of His@AuNCs for the Determination of Alkaline Phosphatase

Fanfan Xiao <sup>1,†</sup>, Yuting Yu <sup>1,†</sup>, Yang Wu <sup>1</sup>, Lili Tian <sup>1</sup>, Guoyan Zhao <sup>1</sup>, Hailong Pang <sup>1</sup> and Jie Du <sup>1,2,\*</sup>

<sup>1</sup> College of Life Sciences, Northwest Normal University, 967 Anning Road, Lanzhou 730070, China; 2018212256@nwnu.edu.cn (F.X.); 2017212141@nwnu.edu.cn (Y.Y.); 2020212651@nwnu.edu.cn (Y.W.); 2018212262@nwnu.edu.cn (L.T.); 2018212254@nwnu.edu.cn (G.Z.); Phl-3088@163.com (H.P.)

<sup>2</sup> Key Laboratory of Bioelectrochemistry & Environmental Analysis of Gansu Province, Northwest Normal University, Lanzhou 730070, China

\* Correspondence: dujie@nwnu.edu.cn

† These authors have made equal contributions to this work and should be considered as co-first authors.

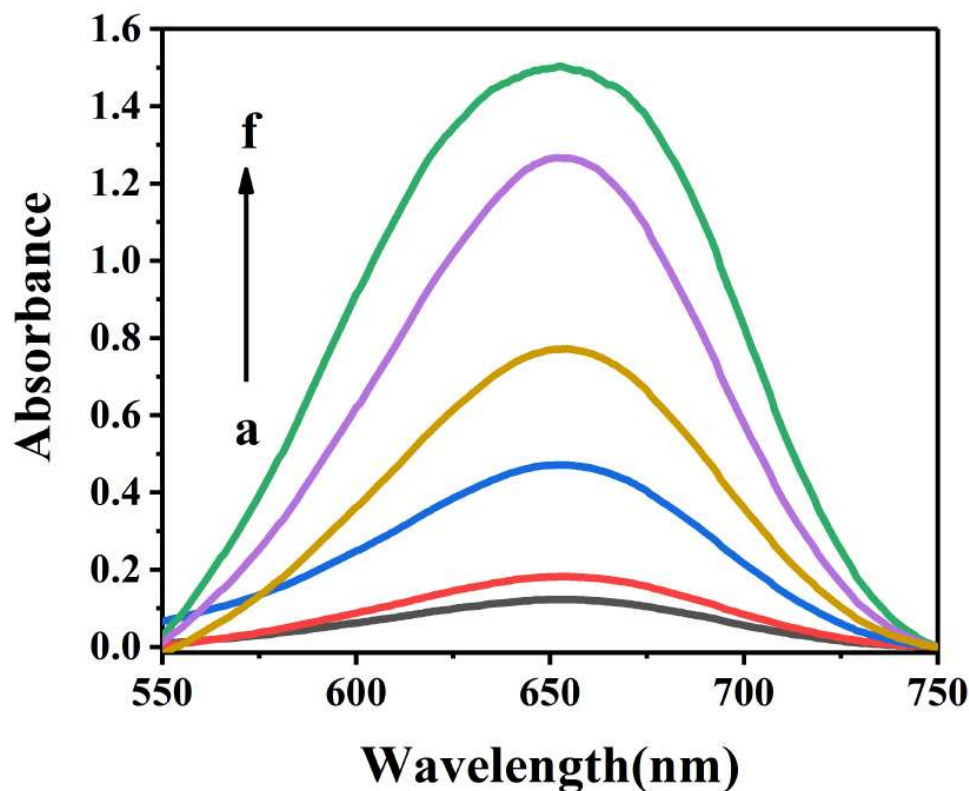

**Figure S1.** UV-Vis absorption spectra of His@AuNCs/GO-TMB system with different incubation ratios of His@AuNCs and PDDA-GO (from a to f: 1:10,1:20,1:30,1:40,1:50,1:100).

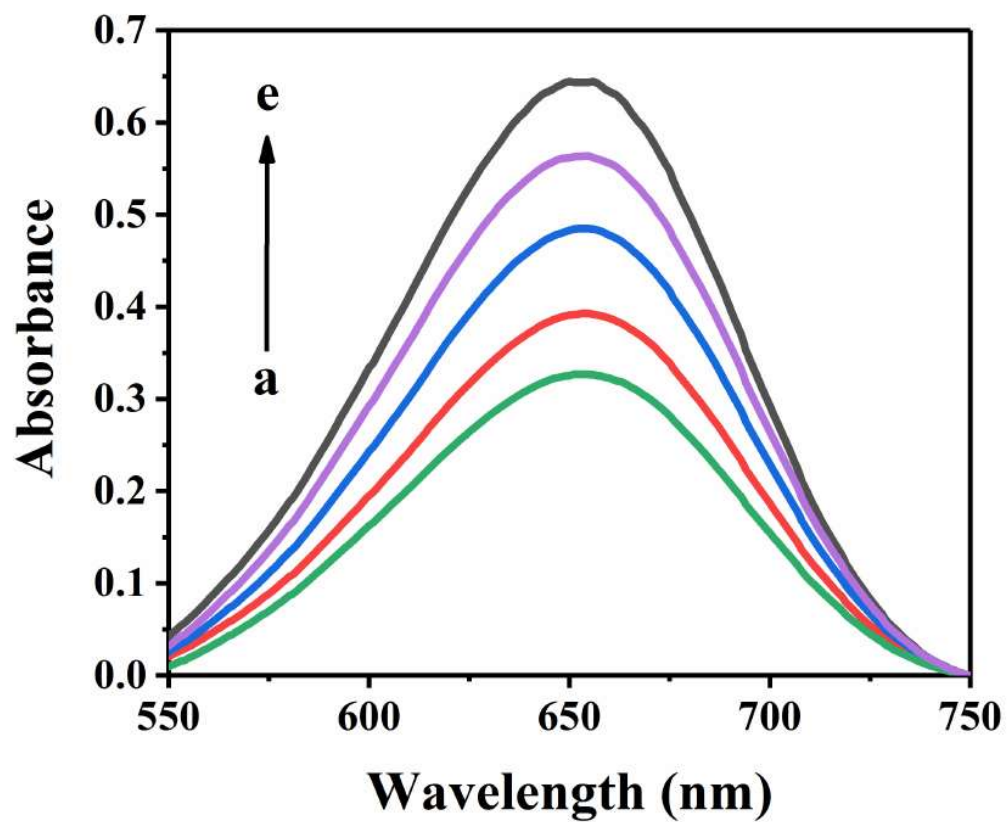

**Figure S2.** UV-Vis absorption spectra of His@AuNCs/GO-TMB system in different concentrations of His@AuNCs/GO (from a to e: 0.002, 0.003, 0.004, 0.005, 0.006 mg/mL).

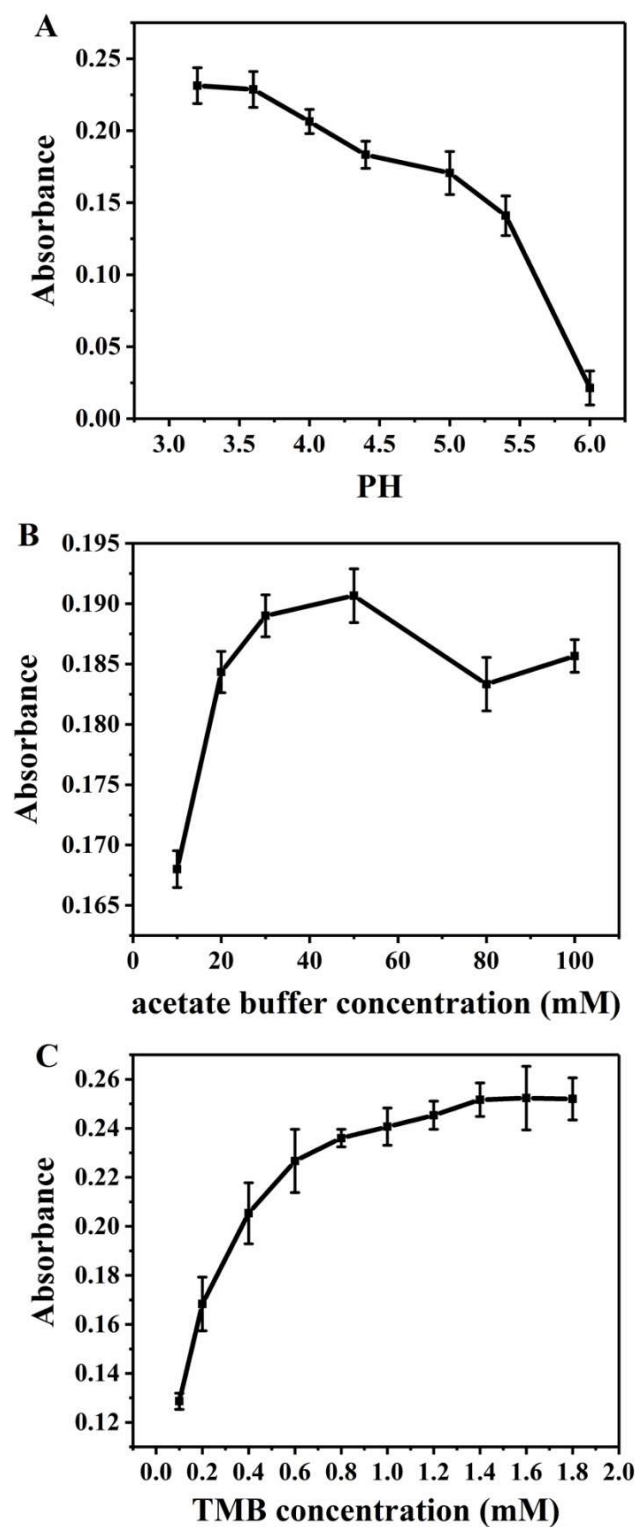

**Figure S3.** Effect of pH (a), acetate buffer (b) and TMB concentration on the oxidase-like activity of His@AuNCs/GO.

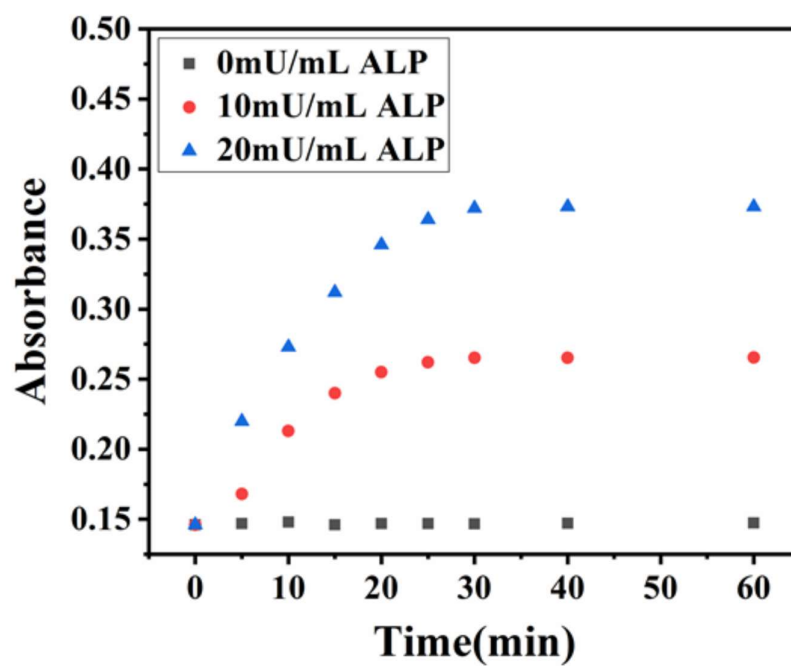

**Figure S4.** The absorbance of the sensing system as a function of the enzymatic reaction time (0, 5, 10, 15, 20, 25, 30, 40, 60 min) in the presence of 0, 10, and 20 mU/mL ALP individually, with PPi as the substrate.

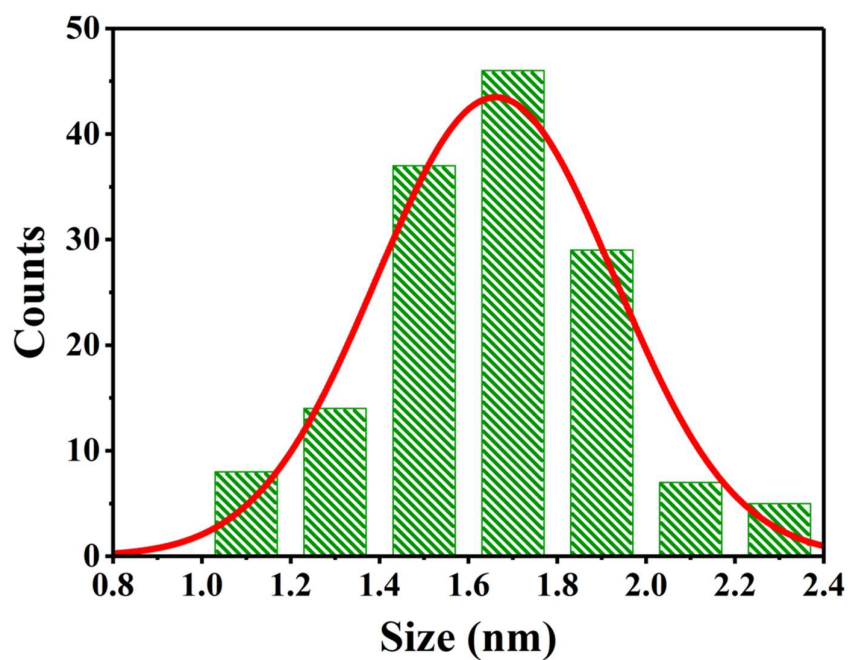

**Figure S5.** The size statistical histograms of His@AuNCs.

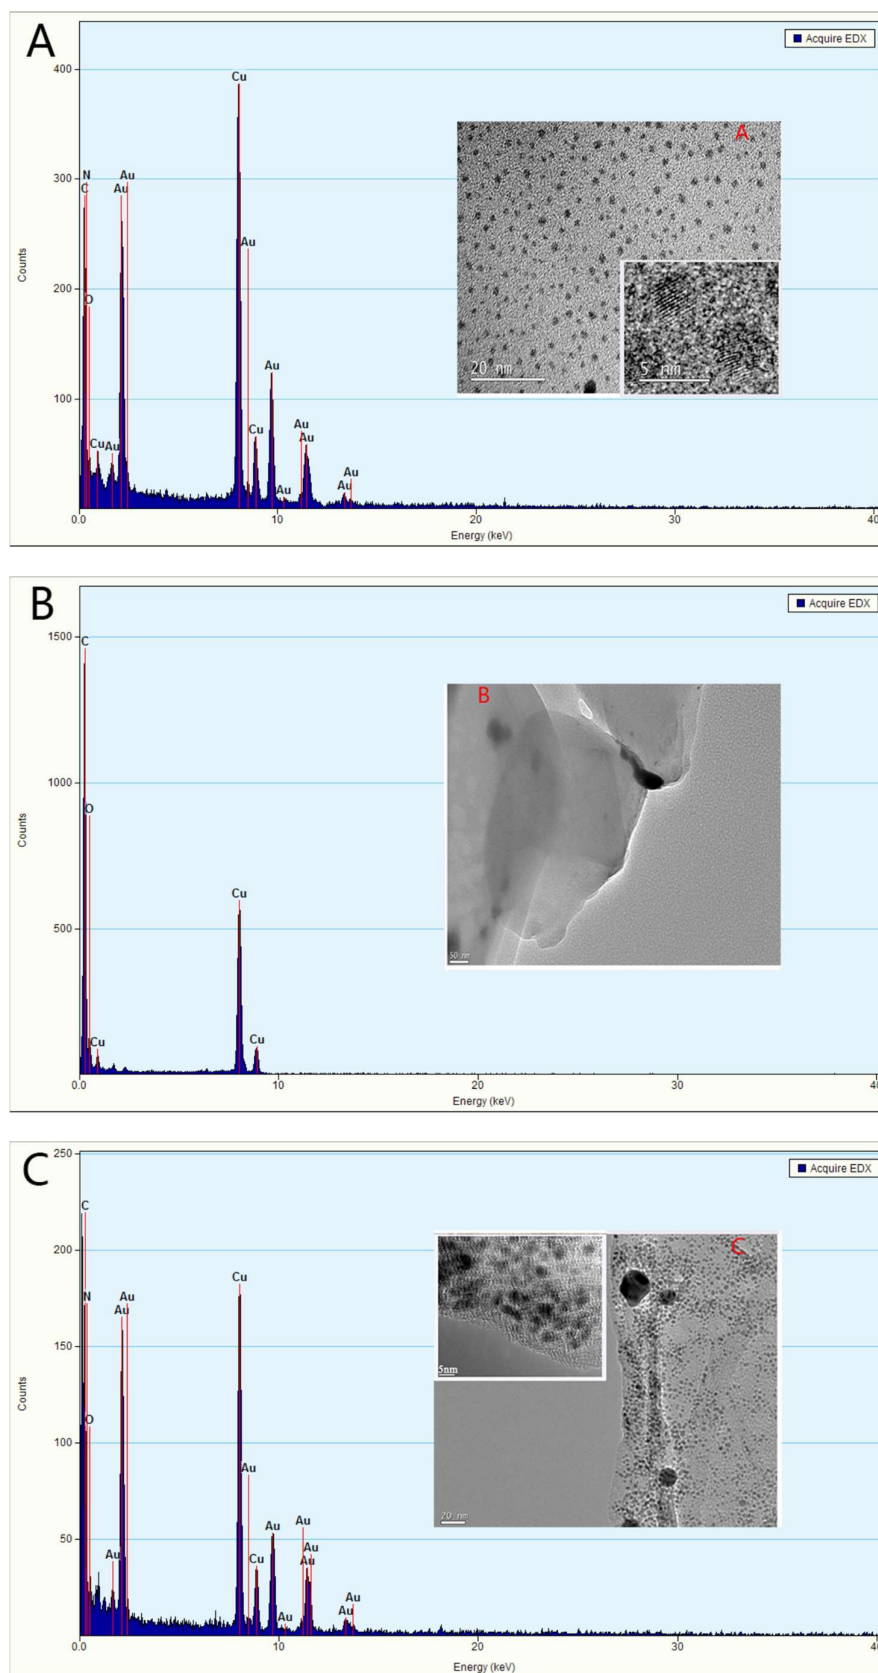

**Figure S6.** EDX of His@AuNCs (A), GO (B) and His@AuNCs/GO (C).

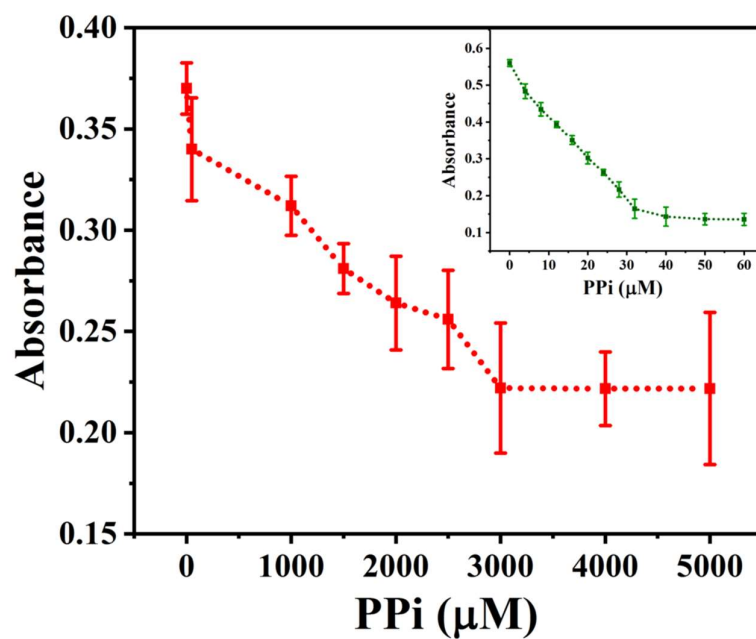

**Figure S7.** The absorbance of the sensing His@AuNCs-TMB system with PPI as the substrate. Inset is the inhibitory effect of PPI on His@AuNCs/GO-TMB system.

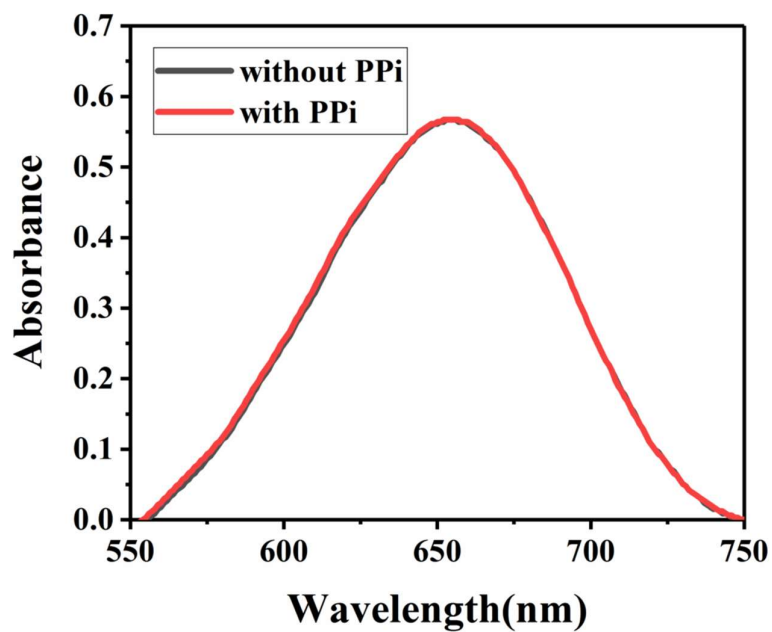

**Figure S8.** Comparison of the UV-Vis absorption spectra of the His@AuNCs/GO-TMB system after 5 min of reaction with PPI and without PPI.

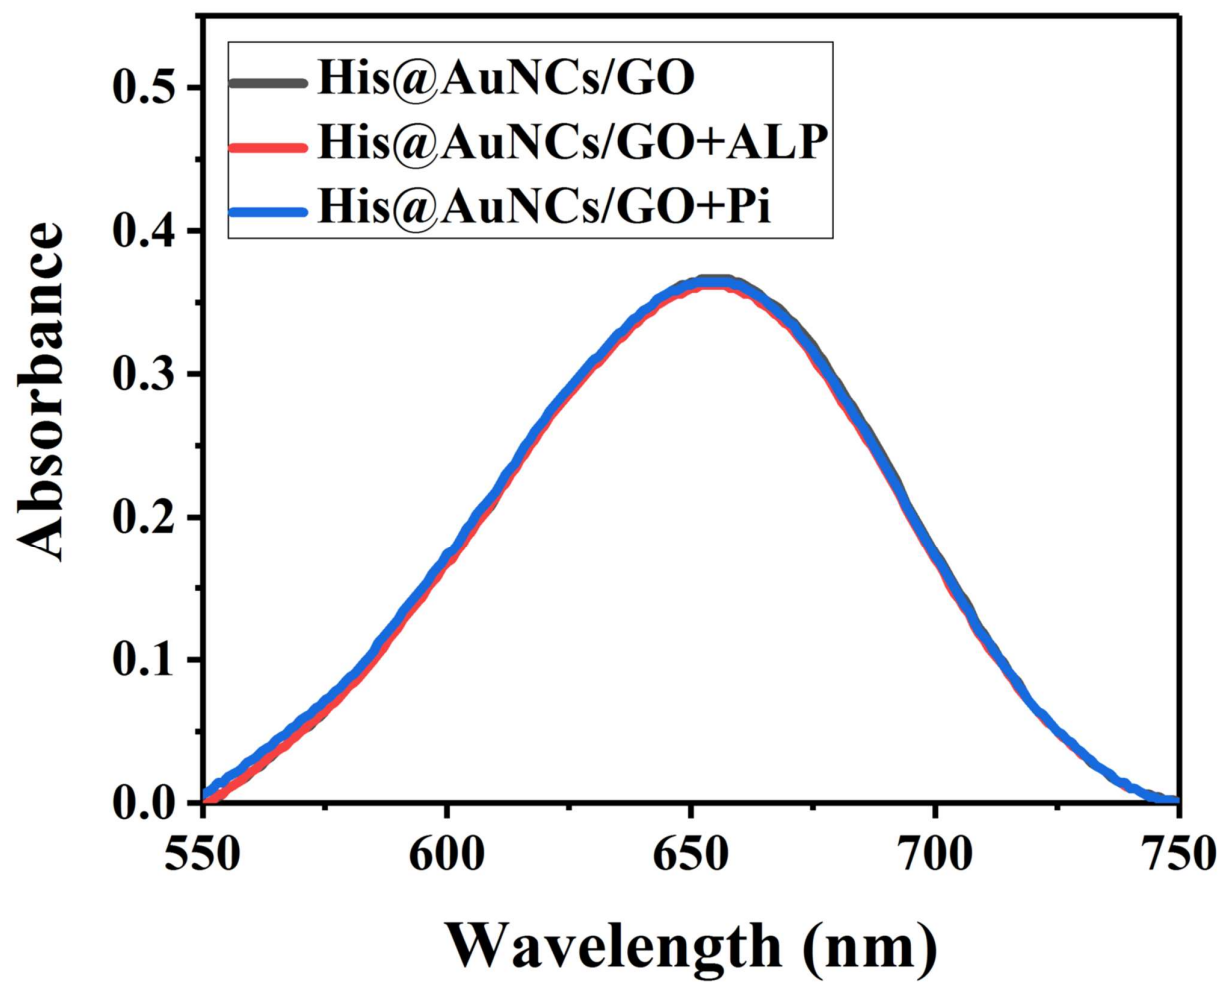

Figure S9. UV-vis absorption spectra of His@AuNCs/GO-TMB system in the presence of ALP and Pi.

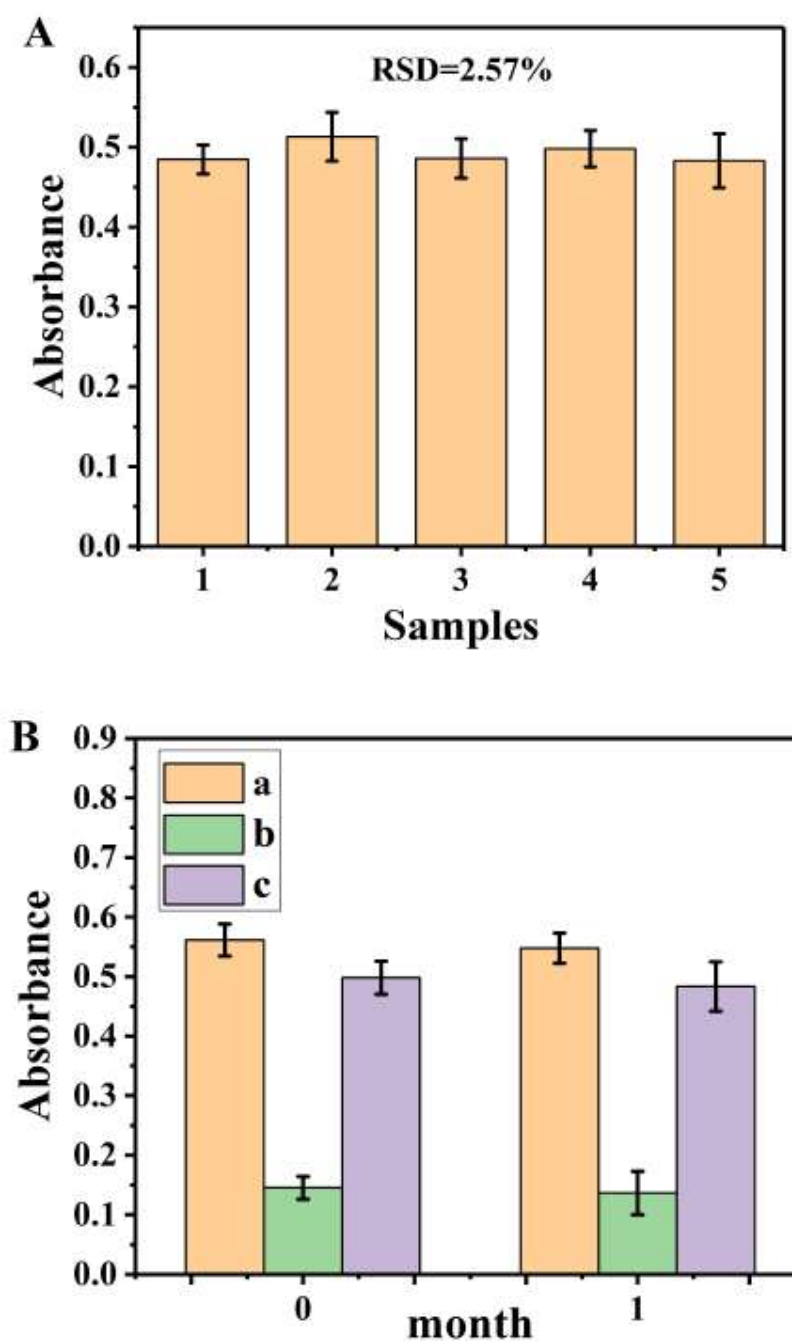

**Figure S10.** (A) Detection of ALP activity by colorimetric sensor established by different batches of His@AuNCs/GO. (B) a represents the oxidase-like activity of His@AuNCs/GO, b and c respectively represent the detection of PPI and ALP by the sensor.
